# Supplementary material
Source: PubMed Central journal article supplement (PMC1857717)
Supplement: pgen.0030050.sg003.pdf [file pgen.0030050.sg003.pdf]

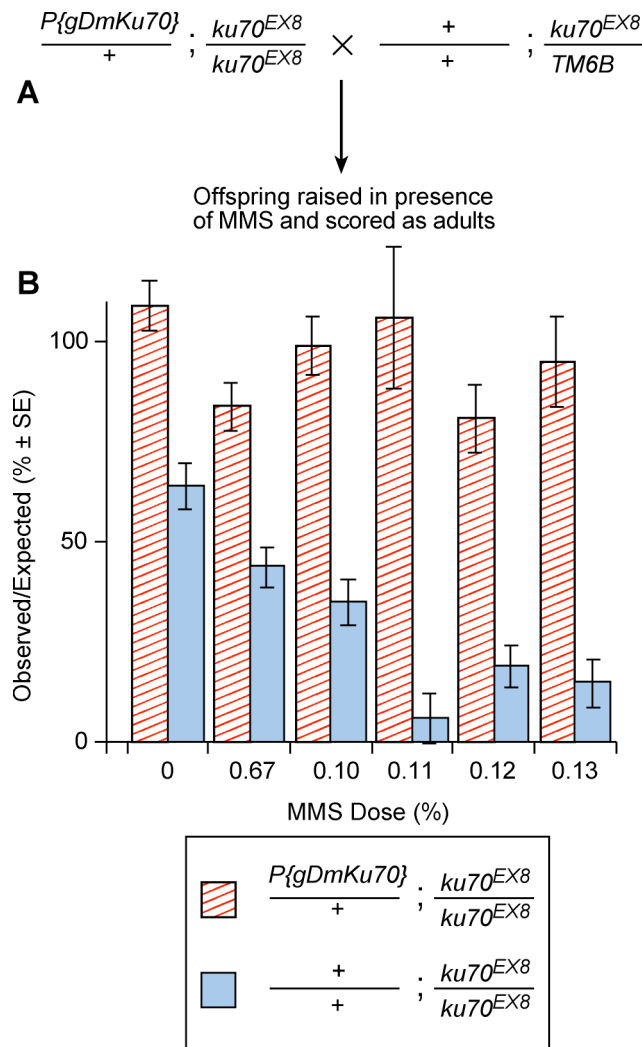

**Figure S3. Mutagen sensitivity of *ku70* mutants and rescue by transgene.** Results show that *ku70<sup>EX8</sup>* homozygotes had decreased survival in the presence of a chemical DSB-forming agent relative to their heterozygous controls. The *Ku70* transgene restored normal sensitivity. Survival of *ku70<sup>EX8</sup>* homozygotes lacking the transgene was reduced even in the absence of the mutagen. **(A)** Offspring from the cross shown were treated with methyl methanesulfonate (MMS) as described [65,68] and scored for the presence of the transgene, *P{gDmKu70}13* on chromosome 2 and the balancer (*i.e.*, dominantly marked crossover suppressor), *TM6B*, on chromosome 3. This transgene carries both *Ku70* and CG6719 (Fig. S1). **(B)** Ratios of the observed to expected numbers of surviving offspring. Expected numbers were half the numbers of surviving *TM6B* heterozygotes. No formal hypothesis tests were performed, but approximate standard errors were computed from the binomial distribution. We assumed that there was a fixed number of *ku70<sup>EX8</sup>* homozygous embryos with and without the transgene equal to the number of surviving *TM6B* heterozygotes. That is, we used  $SE = 2\sqrt{k(t-k)/t^3}$  where  $k$  is the number of *ku70<sup>EX8</sup>* surviving homozygotes and  $t$  is the number of *TM6B* heterozygous survivors.
