# Supplementary material
Source: PubMed Central journal article supplement (PMC1857717)
Supplement: pgen.0030050.sg004.pdf [file pgen.0030050.sg004.pdf]

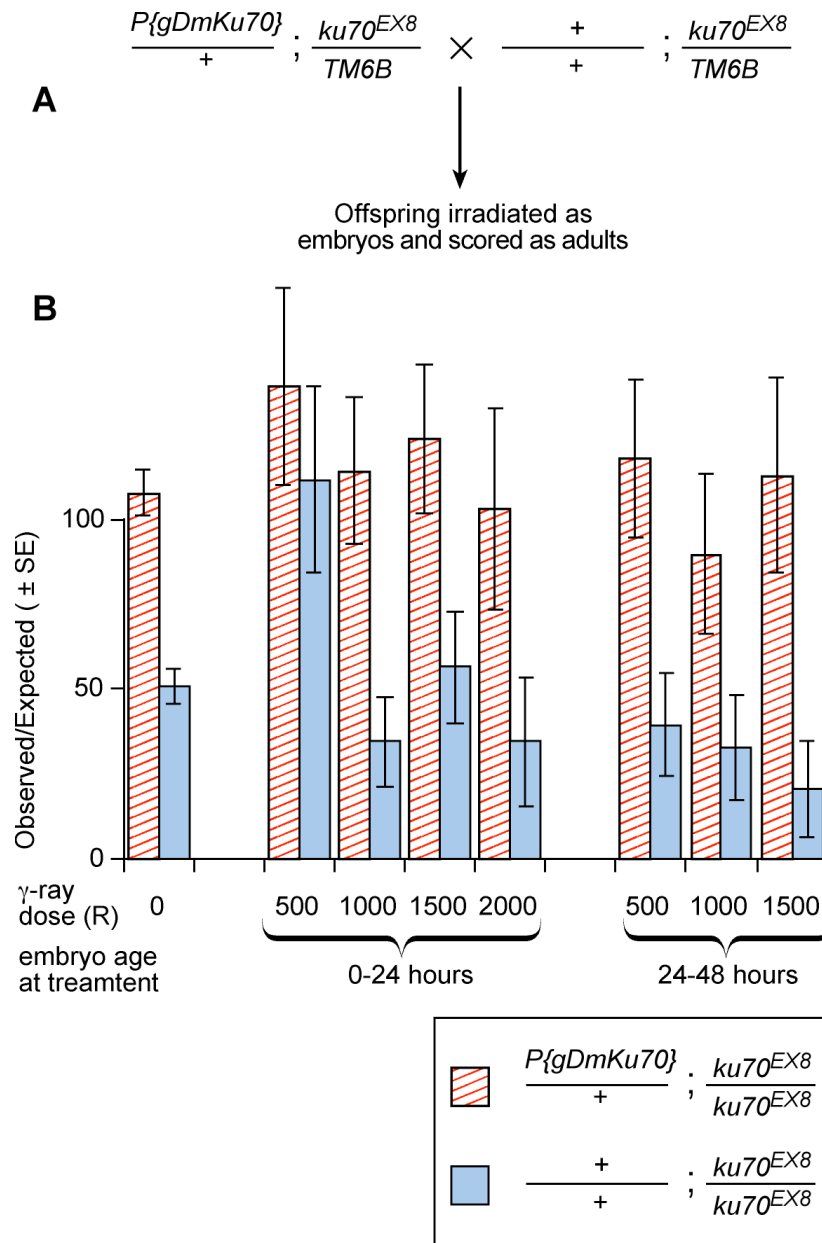

**Figure S4. Sensitivity of *ku70* mutants to gamma radiation and transgene rescue.** Results suggest that homozygous *ku70* mutants are mildly hypersensitive to  $\gamma$  radiation but are fully rescued by the  $P\{gDmKu70\}13$  transgene. (A) Embryos from the cross shown were exposed to a  $^{137}\text{Cs}$  source during the first or second day after eggs were laid. Survivors were then scored as in Fig. S3. (B) Observed/expected ratios were computed as in Fig. S3 except that the expected numbers were one-fourth of the total *TM6B* heterozygotes. The factor of 1/4 instead of 1/2 arises because *TM6B* is heterozygous in both parents. No formal hypothesis tests were computed in the absence of independent replicates, but approximate standard errors were calculated  $se\ SE = 4\sqrt{k(t-k)/t^3}$  under the same assumptions as in Fig. S3.
